# Supplementary material
Source: PubMed Central journal article supplement (PMC2584722)
Supplement: 0806664105_Appendix_PDF.pdf [file 0806664105_Appendix_PDF.pdf]

## SI Appendix

### Model description

#### Abbreviations

|           |                                                                                          |
|-----------|------------------------------------------------------------------------------------------|
| 13BPGA    | 1,3-bisphosphoglycerate                                                                  |
| 2PGA      | 2-phosphoglycerate                                                                       |
| 3PGA      | 3-phosphoglycerate                                                                       |
| AK        | adenylate kinase                                                                         |
| ALD       | aldolase                                                                                 |
| c         | cytosolic                                                                                |
| DHAP      | dihydroxyacetone phosphate                                                               |
| ENO       | enolase                                                                                  |
| Fru16BP   | fructose 1,6-bisphosphate                                                                |
| Fru6P     | fructose 6-phosphate                                                                     |
| g         | glycosomal                                                                               |
| G3PDH     | glycerol-3-phosphate dehydrogenase                                                       |
| GAP       | glyceraldehyde 3-phosphate                                                               |
| GAPDH     | glyceraldehyde-3-phosphate dehydrogenase                                                 |
| Glc       | glucose                                                                                  |
| Glc6P     | glucose 6-phosphate                                                                      |
| Gly3P     | glycerol 3-phosphate                                                                     |
| GK        | glycerol kinase                                                                          |
| GPO       | glycerol-3-phosphate oxidase (=mitochondrial G3PDH plus trypanosome alternative oxidase) |
| HXK       | hexokinase                                                                               |
| $K_{eq}$  | equilibrium constant                                                                     |
| $K_i$     | inhibition constant                                                                      |
| $K_m$     | Michaelis constant                                                                       |
| PEP       | phosphoenolpyruvate                                                                      |
| PFK       | phosphofructokinase                                                                      |
| PGAM      | phosphoglycerate mutase                                                                  |
| PGI       | glucose-6-phosphate isomerase                                                            |
| PGK       | phosphoglycerate kinase                                                                  |
| PYK       | pyruvate kinase                                                                          |
| Pyrtrans  | pyruvate transport                                                                       |
| $r_v$     | ratio $V_{max}$ reverse/ $V_{max}$ forward                                               |
| THT       | trypanosome hexose transporter                                                           |
| TIM       | triosephosphate isomerase                                                                |
| tot       | total                                                                                    |
| v         | enzyme rate                                                                              |
| V         | volume                                                                                   |
| $V_{max}$ | maximum enzyme velocity                                                                  |

*Mathematical modeling in this paper*

The model with the glycosome has been described in (1) and is reproduced below. For the model without a glycosome, the original model was modified as follows:

- a. There is only a single pool of ATP, ADP and AMP, rather than distinct glycosomal and cytosolic pools.
- b. There is no conserved sum of bound phosphates
- c. The same amounts of the same enzymes are in the total cell volume rather than in the cytosol or in the glycosome.

This led to the following balance equations:

$$\frac{d[\text{Glc}]_{\text{in}}}{dt} = \frac{v_{\text{glucose transport}} - v_{\text{HXK}}}{V_{\text{tot}}} \text{ (eq. 1)}$$

$$\frac{d[\text{Glc6P}]}{dt} = \frac{v_{\text{HXK}} - v_{\text{PGI}}}{V_{\text{tot}}} \text{ (eq. 2)}$$

$$\frac{d[\text{Fru6P}]}{dt} = \frac{v_{\text{PGI}} - v_{\text{PFK}}}{V_{\text{tot}}} \text{ (eq. 3)}$$

$$\frac{d[\text{Fru16BP}]}{dt} = \frac{v_{\text{PFK}} - v_{\text{ALD}}}{V_{\text{tot}}} \text{ (eq. 4)}$$

$$\frac{d[\text{DHAP}]}{dt} = \frac{v_{\text{ALD}} + v_{\text{AOX}} - v_{\text{TIM}} - v_{\text{G3PDH}}}{V_{\text{tot}}} \text{ (eq. 5)}$$

$$\frac{d[\text{Gly3P}]}{dt} = \frac{v_{\text{G3PDH}} - v_{\text{GK}} - v_{\text{AOX}}}{V_{\text{tot}}} \text{ (eq. 6)}$$

$$\frac{d[\text{GAP}]}{dt} = \frac{v_{\text{ALD}} + v_{\text{TIM}} - v_{\text{PGK}}}{V_{\text{tot}}} \text{ (eq. 7)}$$

$$\frac{d[\text{13BPGA}]}{dt} = \frac{v_{\text{GAPDH}} - v_{\text{PGK}}}{V_{\text{tot}}} \text{ (eq. 8)}$$

$$\frac{d[\text{2PGA}]}{dt} = \frac{v_{\text{PGAM}} - v_{\text{ENO}}}{V_{\text{tot}}} \text{ (eq. 9)}$$

$$\frac{d[\text{3PGA}]}{dt} = \frac{v_{\text{PGK}} - v_{\text{PGAM}}}{V_{\text{tot}}} \text{ (eq. 10)}$$

$$\frac{d[\text{PEP}]}{dt} = \frac{v_{\text{ENO}} - v_{\text{PYK}}}{V_{\text{tot}}} \text{ (eq. 11)}$$

$$\frac{d[\text{pyruvate}]_{\text{in}}}{dt} = \frac{v_{\text{PYK}} - v_{\text{pyruvate transport}}}{V_{\text{tot}}} \text{ (eq. 12)}$$

$$\frac{d[\text{NADH}]}{dt} = \frac{v_{\text{GAPDH}} - v_{\text{G3PDH}}}{V_{\text{tot}}} \text{ (eq. 13)}$$

$$\frac{d[\text{P}]}{dt} = \frac{-v_{\text{HXK}} - v_{\text{PFK}} + v_{\text{PGK}} + v_{\text{GK}} + v_{\text{PYK}} - v_{\text{ATP utilization}}}{V_{\text{tot}}} \text{ (eq. 14)}$$

In the last equation the variable P refers to the free energy accumulation in both ATP and ADP and is defined as:

$$P \equiv 2[\text{ATP}] + [\text{ADP}] \quad (\text{eq.15})$$

The concentrations of ATP, ADP and AMP were calculated as described earlier (2), based on the conservation relation for adenine nucleotides and the equilibrium equation of adenylate kinase. The solution for ATP is:

$$[\text{ATP}] = \frac{-b + \sqrt{b^2 - 4ac}}{2a} \quad (\text{eq. 16})$$

in which:

$$a = 1 - 4K_{\text{eq, AK}}$$

$$b = C_2 - P(1 - 4K_{\text{eq, AK}})$$

$$c = -K_{\text{eq, AK}}P^2$$

$C_2$  is the sum of cytosolic adenine nucleotides (4 mM). ADP was then calculated from P, ATP and equation 15 and AMP was calculated from  $C_2$

The concentration of NAD was calculated from the conserved sum:

$$C_3 = [\text{NAD}^+] + [\text{NADH}] = 4 \text{ mM}$$

In these equations the kinetic equations of the enzymes and all parameter values were the same as in the original model ((1) and supplemental data 2). The enzyme rates  $v$  were expressed in  $\text{nmol min}^{-1} (\text{mg protein})^{-1}$ , the time  $t$  in min, the metabolite concentrations in mM and the total cell volume  $V_{\text{tot}}$  in  $\mu\text{l} (\text{mg protein})^{-1}$ .

All simulations applied to aerobic conditions, at zero concentrations of the products pyruvate and glycerol when glucose was the substrate, and at zero concentrations of glucose and pyruvate when glycerol was the substrate.

For the time simulations, the substrate was elevated from 0.01 mM to 25 mM and the concentrations of glycolytic intermediates were followed in time. When in addition to glycosome removal also the  $V_{\text{max}}$  of a kinase was lowered the substrate level was elevated from 0.1 mM to 25 mM.

Simulations were done in Jarnac 2.0 (3, 4)

## Full description of the mathematical model

Below a complete description is given of the model with the glycosome present, which was published previously in:

Albert, M., Haanstra, J., Hannaert, V., Van Roy, J., Opperdoes, F., Bakker, B., and Michels, P. (2005) Experimental and in silico analyses of glycolytic flux control in bloodstream form *Trypanosoma brucei*. *The Journal of biological chemistry* **280**, 28306-28315

### Rate equations

Glucose transport

$$v_{\text{THT}} = V_{\text{max}}^f \cdot \frac{[\text{Glc}]_{\text{out}} - [\text{Glc}]_{\text{in}}}{K_m^{\text{Glc}} + [\text{Glc}]_{\text{out}} + [\text{Glc}]_{\text{in}} + \alpha \cdot [\text{Glc}]_{\text{out}} \frac{[\text{Glc}]_{\text{int}}}{K_m^{\text{Glc}}}} \quad (\text{eq.1})$$

$$V_{\text{max}}^f = 108.9 \text{ nmol min}^{-1} (\text{mg cell protein})^{-1} \quad (1)$$

$$K_m^{\text{Glc}} = 1 \text{ mM} \quad (5)$$

$$\alpha = 0.75 \quad (2)$$

Hexokinase

$$v_{\text{HXX}} = V_{\text{max}}^f \cdot \frac{\frac{[\text{Glc}]_{\text{in}}}{K_m^{\text{Glc}_{\text{in}}}} \cdot \frac{[\text{ATP}]_g}{K_m^{\text{ATP}}}}{\left(1 + \frac{[\text{ATP}]_g}{K_m^{\text{ATP}}} + \frac{[\text{ADP}]_g}{K_m^{\text{ADP}}}\right) \cdot \left(1 + \frac{[\text{Glc}]_{\text{in}}}{K_m^{\text{Glc}_{\text{in}}}} + \frac{[\text{Glc6P}]}{K_m^{\text{Glc6P}}}\right)} \quad (\text{eq. 2})$$

$$V_{\text{max}}^f = 1929 \text{ nmol min}^{-1} (\text{mg cell protein})^{-1} \quad (1)$$

$$K_m^{\text{Glc}_{\text{in}}} = 0.1 \text{ mM} \quad (2)$$

$$K_m^{\text{ATP}} = 0.116 \text{ mM} \quad (6)$$

$$K_m^{\text{ADP}} = 0.126 \text{ mM} \quad (6)$$

$$K_m^{\text{Glc6P}} = 12 \text{ mM} \quad (7)$$

Glucose-6-phosphate isomerase

$$v_{PGI} = V_{\max}^f \cdot \frac{\frac{[Glc6P]}{K_m^{Glc6P}} - r_v \cdot \frac{[Fru6P]}{K_m^{Fru6P}}}{1 + \frac{[Glc6P]}{K_m^{Glc6P}} + \frac{[Fru6P]}{K_m^{Fru6P}}} \quad (\text{eq. 3})$$

$$V_{\max}^f = 1305 \text{ nmol min}^{-1} (\text{mg cell protein})^{-1} \quad (1)$$

$$r_v = 1 \quad (8)$$

$$K_m^{Glc6P} = 0.4 \text{ mM} \quad (8)$$

$$K_m^{Fru6P} = 0.12 \text{ mM} \quad (8)$$

### Phosphofructokinase

$$v_{PFK} = V_{\max}^f \cdot \left( \frac{K_i^1}{[Fru16BP] + K_i^1} \right) \cdot \frac{\frac{[Fru6P]}{K_m^{Fru6P}} \cdot \frac{[ATP]_g}{K_m^{ATP}}}{\left( 1 + \frac{[Fru6P]}{K_m^{Fru6P}} + \frac{[Fru16BP]}{K_i^2} \right) \cdot \left( 1 + \frac{[ATP]_g}{K_m^{ATP}} \right)} \quad (\text{eq. 4})$$

$$V_{\max}^f = 1708 \text{ nmol min}^{-1} (\text{mg cell protein})^{-1} \quad (1)$$

$$K_m^{Fru6P} = 0.82 \text{ mM} \quad (9)$$

$$K_m^{ATP} = 2.6 \cdot 10^{-2} \text{ mM} \quad (9)$$

$$K_i^1 = 15.8 \text{ mM} \quad (10)$$

$$K_i^2 = 10.7 \text{ mM} \quad (10)$$

### Aldolase

$$v_{ALD} = V_{\max}^f \cdot \frac{[Fru16BP] - \frac{[GAP][DHAP]_g}{K_{eq}}}{K_m^{Fru16BP} + [Fru16BP] + \frac{1}{r_v} \cdot \frac{K_m^{DHAP} [GAP]}{K_{eq}} + \frac{1}{r_v} \cdot \frac{K_m^{GAP} [DHAP]_g}{K_{eq}} + \frac{1}{r_v} \cdot \frac{[GAP][DHAP]_g}{K_{eq}} + \frac{[Fru16BP][GAP]}{K_i^{GAP}}} \quad (\text{eq. 5})$$

$$V_{\max}^f = 560 \text{ nmol min}^{-1} (\text{mg cell protein})^{-1} \quad (1)$$

$$r_v = 1.19 \quad (11)$$

$$K_{eq} = 6.9 \cdot 10^{-2} \text{ mM} \quad (11)$$

$$K_m^{Fru16BP} = 9 \cdot 10^{-3} \cdot \left( 1 + \frac{[ATP]_g}{0.68 \text{ mM}} + \frac{[ADP]_g}{1.51 \text{ mM}} + \frac{[AMP]_g}{3.65 \text{ mM}} \right) \text{ mM} \quad (\text{eq. 6})$$

$$K_m^{DHAP} = 1.5 \cdot 10^{-2} \cdot \left( 1 + \frac{[ATP]_g}{0.68 \text{ mM}} + \frac{[ADP]_g}{1.51 \text{ mM}} + \frac{[AMP]_g}{3.65 \text{ mM}} \right) \text{ mM} \quad (\text{eq. 7})$$

$$K_m^{GAP} = 6.7 \cdot 10^{-2} \text{ mM} \quad (11)$$

$$K_i^{GAP} = 9.8 \cdot 10^{-2} \text{ mM (11)}$$

Triosephosphate isomerase

$$v_{TIM} = V_{\max}^f \cdot \frac{\frac{[DHAP]_g}{K_m^{DHAP}} - r_v \cdot \frac{[GAP]}{K_m^{GAP}}}{1 + \frac{[DHAP]_g}{K_m^{DHAP}} + \frac{[GAP]}{K_m^{GAP}}} \text{ (eq. 8)}$$

$$V_{\max}^f = 999.3 \text{ nmol min}^{-1} \text{ (mg cell protein)}^{-1} \text{ (1)}$$

$$r_v = 5.7$$

$$K_m^{DHAP} = 1.2 \text{ mM (12)}$$

$$K_m^{GAP} = 0.25 \text{ mM (12)}$$

Glyceraldehyde-3-phosphate dehydrogenase

$$v_{GAPDH} = V_{\max}^f \cdot \frac{\frac{[GAP][NAD^+]}{K_m^{GAP} K_m^{NAD^+}} - r_v \cdot \frac{[13BPGA][NADH]}{K_m^{13BPGA} K_m^{NADH}}}{\left(1 + \frac{[GAP]}{K_m^{GAP}} + \frac{[13BPGA]}{K_m^{13BPGA}}\right) \cdot \left(1 + \frac{[NAD^+]}{K_m^{NAD^+}} + \frac{[NADH]}{K_m^{NADH}}\right)} \text{ (eq. 9)}$$

$$V_{\max}^f = 720.9 \text{ nmol min}^{-1} \text{ (mg cell protein)}^{-1} \text{ (1)}$$

$$r_v = 0.67$$

$$K_m^{GAP} = 0.15 \text{ mM (13)}$$

$$K_m^{NAD^+} = 0.45 \text{ mM (13)}$$

$$K_m^{13BPGA} = 0.1 \text{ mM (13)}$$

$$K_m^{NADH} = 0.02 \text{ mM (13)}$$

Glycerol-3-phosphate dehydrogenase

$$v_{G3PDH} = V_{\max}^f \cdot \frac{\frac{[DHAP]_g [NADH]}{K_m^{DHAP} K_m^{NADH}} - r_v \cdot \frac{[Gly3P]_g [NAD^+]}{K_m^{Gly3P} K_m^{NAD^+}}}{\left(1 + \frac{[DHAP]_g}{K_m^{DHAP}} + \frac{[Gly3P]_g}{K_m^{Gly3P}}\right) \cdot \left(1 + \frac{[NADH]}{K_m^{NADH}} + \frac{[NAD^+]}{K_m^{NAD^+}}\right)} \text{ (eq. 10)}$$

$$V_{\max}^f = 465 \text{ nmol min}^{-1} \text{ (mg cell protein)}^{-1} \text{ (1)}$$

$$r_v = 0.28 \text{ (14)}$$

$$K_m^{DHAP} = 0.1 \text{ mM (14)}$$

$$K_m^{NADH} = 0.01 \text{ mM (14)}$$

$$K_m^{Gly3P} = 2 \text{ mM (close to value in (14))}$$

$$K_m^{NAD^+} = 0.4 \text{ mM (close to value in (14))}$$

Glycerol-3-phosphate oxidase

$$v_{GPO} = V_{\max}^f \cdot \frac{\frac{[Gly3P]_c}{K_m^{Gly3P}}}{1 + \frac{[Gly3P]_c}{K_m^{Gly3P}}} \text{ (eq. 11)}$$

$$V_{\max}^f = 368 \text{ nmol min}^{-1} \text{ (mg cell protein)}^{-1} \text{ (15)}$$

$$K_m^{Gly3P} = 1.7 \text{ mM (15)}$$

Glycerol kinase

$$v_{GK} = V_{\max}^f \cdot \frac{\frac{[Gly3P]_g}{K_m^{Gly3P}} \frac{[ADP]_g}{K_m^{ADP}} - r_v \cdot \frac{[Glycerol]}{K_m^{Glycerol}} \frac{[ATP]_g}{K_m^{ATP}}}{\left(1 + \frac{[Gly3P]_g}{K_m^{Gly3P}} + \frac{[Glycerol]}{K_m^{Glycerol}}\right) \cdot \left(1 + \frac{[ADP]_g}{K_m^{ADP}} + \frac{[ATP]_g}{K_m^{ATP}}\right)} \text{ (eq. 12)}$$

$$V_{\max}^f = 200 \text{ nmol min}^{-1} \text{ (mg cell protein)}^{-1} \text{ (2)}$$

$$r_v = 60.86 \text{ (1, 16)}$$

$$K_m^{Gly3P} = 3.83 \text{ mM (16)}$$

$$K_m^{ADP} = 0.56 \text{ mM (16)}$$

$$K_m^{Glycerol} = 0.44 \text{ mM (16)}$$

$$K_m^{ATP} = 0.24 \text{ mM (16)}$$

Phosphoglycerate kinase

$$v_{PGK} = V_{\max}^f \cdot \frac{\frac{[13BPGA]}{K_m^{13BPGA}} \frac{[ADP]_g}{K_m^{ADP}} - r_v \cdot \frac{[3PGA]}{K_m^{3PGA}} \frac{[ATP]_g}{K_m^{ATP}}}{\left(1 + \frac{[13BPGA]}{K_m^{13BPGA}} + \frac{[3PGA]}{K_m^{3PGA}}\right) \cdot \left(1 + \frac{[ADP]_g}{K_m^{ADP}} + \frac{[ATP]_g}{K_m^{ATP}}\right)} \text{ (eq. 13)}$$

$$V_{\max}^f = 2862 \text{ nmol min}^{-1} \text{ (mg cell protein)}^{-1} \text{ (1)}$$

$$r_v = 0.47 \text{ (1, 17)}$$

$$K_m^{13BPGA} = 3 \cdot 10^{-3} \text{ mM (1, 17)}$$

$$K_m^{ADP} = 0.1 \text{ mM (18)}$$

$$K_m^{3PGA} = 1.62 \text{ mM (18)}$$

$$K_m^{ATP} = 0.29 \text{ mM} \quad (18)$$

Phosphoglycerate mutase

$$v_{PGAM} = V_{\max}^f \cdot \frac{\frac{[3PGA]}{K_m^{3PGA}} - r_v \cdot \frac{[2PGA]}{K_m^{2PGA}}}{1 + \frac{[3PGA]}{K_m^{3PGA}} + \frac{[2PGA]}{K_m^{2PGA}}} \quad (\text{eq. 14})$$

$$V_{\max}^f = 225 \text{ nmol min}^{-1} (\text{mg cell protein})^{-1} \quad (1)$$

$$r_v = 2.2 \text{ (consistent with } K_{\text{eq}} = 0.187 \text{ mM)} \quad (1)$$

$$K_m^{3PGA} = 0.27 \text{ mM} \quad (19, 20)$$

$$K_m^{2PGA} = 0.11 \text{ mM} \quad (19, 20)$$

Enolase

$$v_{ENO} = V_{\max}^f \cdot \frac{\frac{[2PGA]}{K_m^{2PGA}} - r_v \cdot \frac{[PEP]}{K_m^{PEP}}}{1 + \frac{[2PGA]}{K_m^{2PGA}} + \frac{[PEP]}{K_m^{PEP}}} \quad (\text{eq. 15})$$

$$V_{\max}^f = 598 \text{ nmol min}^{-1} \text{ mg cell protein}^{-1} \quad (1)$$

$$r_v = 0.66 \text{ (consistent with } K_{\text{eq}} = 6.7 \text{ mM)} \quad (1)$$

$$K_m^{2PGA} = 0.054 \text{ mM} \quad (21)$$

$$K_m^{PEP} = 0.24 \text{ mM} \quad (21)$$

Pyruvate kinase

$$v_{PYK} = V_{\max}^f \cdot \frac{\left(\frac{[PEP]}{K_m^{PEP}}\right)^n \cdot \frac{[ADP]_c}{K_m^{ADP}}}{\left(1 + \left(\frac{[PEP]}{K_m^{PEP}}\right)^n\right) \cdot \left(1 + \frac{[ADP]_c}{K_m^{ADP}}\right)} \quad (\text{eq. 16})$$

$$V_{\max}^f = 1020 \text{ nmol min}^{-1} (\text{mg cell protein})^{-1} \quad (1)$$

$$K_m^{PEP} = 0.34 \cdot \left(1 + \frac{[ATP]_c}{0.57 \text{ mM}} + \frac{[ADP]_c}{0.64 \text{ mM}}\right) \text{ mM} \quad (\text{eq. 17})$$

$$K_m^{ADP} = 0.114 \text{ mM} \quad (22)$$

$$n = 2.5 \quad (11, 23)$$

ATP utilisation



$$v_{ATP\text{ utilisation}} = k \cdot \frac{[ATP]_c}{[ADP]_c} \text{ (eq. 18)}$$

$$k = 50 \text{ nmol min}^{-1} (\text{mg cell protein})^{-1} \text{ (2)}$$

Pyruvate transport out of the cell

$$v_{\text{Pytrans}} = V_{\text{max}}^f \cdot \frac{\frac{[Pyruvate]}{K_m^{\text{pyruvate}}}}{1 + \frac{[Pyruvate]}{K_m^{\text{pyruvate}}}} \text{ (eq. 19)}$$

$$V_{\text{max}}^f = 200 \text{ nmol min}^{-1} (\text{mg cell protein})^{-1} \text{ (8)}$$

$$K_m^{\text{pyruvate}} = 1.96 \text{ mM (24)}$$

### Differential equations

$$\frac{d[Glc]_m}{dt} = \frac{v_{THT} - v_{HXK}}{V_{tot}} \text{ (eq. 20)}$$

$$\frac{d[Glc6P]}{dt} = \frac{v_{HXK} - v_{PGI}}{V_g} \text{ (eq. 21)}$$

$$\frac{d[Fru6P]}{dt} = \frac{v_{PGI} - v_{PFK}}{V_g} \text{ (eq. 22)}$$

$$\frac{d[Fru16BP]}{dt} = \frac{v_{PFK} - v_{ALD}}{V_g} \text{ (eq. 23)}$$

$$\frac{d[GAP]}{dt} = \frac{v_{ALD} + v_{TIM} - v_{GAPDH}}{V_g} \text{ (eq. 24)}$$

$$\frac{d[DHAP]}{dt} = \frac{v_{ALD} - v_{TIM} - v_{G3PDH} + v_{GPO}}{V_{tot}} \text{ (eq. 25)}$$

in which [DHAP] represents the average DHAP concentration:

$$[DHAP] \equiv \frac{[DHAP]_g \cdot V_g + [DHAP]_c \cdot V_c}{V_{tot}} \text{ (eq. 26)}$$

$$\frac{d[13BPGA]}{dt} = \frac{v_{GAPDH} - v_{PGK}}{V_g} \text{ (eq. 27)}$$

$$\frac{d[3PGA]}{dt} = \frac{v_{PGK} - v_{PGAM}}{V_{tot}} \text{ (eq. 28)}$$

in which

$$[3PGA] \equiv \frac{[3PGA]_g \cdot V_g + [3PGA]_c \cdot V_c}{V_{tot}} \text{ (eq. 29)}$$

$$\frac{d[2PGA]}{dt} = \frac{v_{PGAM} - v_{ENO}}{V_c} \text{ (eq. 30)}$$

$$\frac{d[PEP]}{dt} = \frac{v_{ENO} - v_{PYK}}{V_c} \text{ (eq. 31)}$$

$$\frac{d[Pyruvate]}{dt} = \frac{v_{PYK} - v_{pyrtrans}}{V_c} \text{ (eq. 32)}$$

$$\frac{d[NADH]}{dt} = \frac{v_{GAPDH} - v_{G3PDH}}{V_g} \text{ (eq. 33)}$$

$$\frac{d[P]_g}{dt} = \frac{-v_{HXK} - v_{PFK} + v_{PGK} + v_{GK}}{V_g} \text{ (eq. 34)}$$

$$\frac{d[P]_c}{dt} = \frac{v_{PYK} - v_{ATP\ utilisation}}{V_c} \text{ (eq. 35)}$$

$P_g$  and  $P_c$  denote the sums of high-energy phosphates in the glycosome and the cytosol respectively:

$$P_g \equiv 2[ATP]_g + [ADP]_g \text{ (eq. 36)}$$

$$P_c \equiv 2[ATP]_c + [ADP]_c \text{ (eq. 37)}$$

Conserved sums

$$C_1 = [AMP]_g + [ADP]_g + [ATP]_g = 6 \text{ mM (eq. 38)}$$

$$C_2 = [AMP]_c + [ADP]_c + [ATP]_c = 3.9 \text{ mM (eq. 39)}$$

$$C_3 = [NADH] + [NAD^+] = 4 \text{ mM (eq. 40)}$$

$$C_4 = [DHAP]_g + [Gly3P]_g + [Glc6P] + [Fru6P] + 2[Fru16BP] + [GAP] + [13BPGA] + P_g = 45 \text{ mM (eq. 41)}$$

$$C_5 = [DHAP]_c + [Gly3P]_c = 5 \text{ mM (eq. 42)}$$

The exchange of DHAP and Gly3P between the cytosol and glycosomes is assumed to be in equilibrium.

Calculations are done according to (8)

The  $[DHAP]_c$  is calculated from

$$[DHAP]_c = \frac{C_5 \cdot [DHAP] \cdot \left( \frac{V_c}{V_g} + 1 \right)}{C_5 \cdot \frac{V_c}{V_g} + R} \text{ (eq. 43)}$$

in which

$$R \equiv [DHAP]_g + [Gly3P]_g = C_4 - [Glc6P] - [Fru6P] - 2[Fru16BP] - [GAP] - [13BPGA] - P_g \quad (\text{eq. 44})$$

[Gly3P]<sub>c</sub> is calculated from eq. 42, [DHAP]<sub>g</sub> from eq. 26 and [Gly3P]<sub>g</sub> from eq. 41

The [NAD<sup>+</sup>] is calculated from eq. 40

The glycosomal [ATP], [ADP] and [AMP] concentrations are calculated as described in (2), based on the conserved relation for adenine nucleotides and the equilibrium constant of the adenylate kinase in that compartment:

$$[ATP]_g = \frac{-b_g + \sqrt{b_g^2 - 4a_g c_g}}{2a_g} \quad (\text{eq. 45})$$

in which

$$a_g = 1 - 4K_{eq}$$

$$b_g = C_1 - P_g (1 - 4K_{eq}^{AK})$$

$$c_g = -K_{eq} P_g^2$$

and

$$K_{eq}^{AK} = \frac{[AMP]_g [ATP]_g}{[ADP]_g^2} = 0.442 \text{ mM (25)} \quad (\text{eq. 46})$$

The concentrations of ADP and AMP are calculated from the equations for P<sub>g</sub> and C<sub>1</sub> respectively. For the cytosolic concentrations [ATP]<sub>c</sub>, [ADP]<sub>c</sub> and [AMP]<sub>c</sub>, P<sub>c</sub> is substituted for P<sub>g</sub> and C<sub>2</sub> by C<sub>1</sub>.

The enzyme rates *v* are expressed in nmol min<sup>-1</sup> (mg cell protein)<sup>-1</sup>, the time *t* in minutes, the metabolite concentrations in mM and the total cell volume *V*<sub>tot</sub> in μl (mg protein)<sup>-1</sup>.

$$V_{tot} = 5.7 \text{ } \mu\text{l (mg cell protein)}^{-1} \text{ and } \frac{V_c}{V_g} = 22.3 \quad (26)$$

### Concentrations of metabolites

Glucose external: 5 mM

Glycerol: 0 mM

## References

1. Albert M-A, Haanstra J, Hannaert V, Van Roy J, Opperdoes F, Bakker B, Michels P (2005) Experimental and in silico analyses of glycolytic flux control in bloodstream form *Trypanosoma brucei* *J Biol Chem* **280**, 28306-28315.
2. Bakker BM, Michels PA, Opperdoes FR, Westerhoff HV (1997) Glycolysis in bloodstream form *Trypanosoma brucei* can be understood in terms of the kinetics of the glycolytic enzymes *J Biol Chem* **272**, 3207-3215.
3. Sauro HM (2000) in *Animating the Cellular Map: Proceedings of the 9th International Meeting on BioThermoKinetics*, ed. Hofmeyr, J. H. S., Rohwer, J.M., and Snoep, J.L. (Stellenbosch University Press, South Africa).
4. Sauro HM, Hucka M, Finney A, Wellock C, Bolouri H, Doyle J, Kitano H (2003) *OMICS J. Integrative Biol.* **7**, 355-372.
5. Bakker BM, Walsh MC, ter Kuile BH, Mensonides FI, Michels PA, Opperdoes FR, Westerhoff HV (1999) Contribution of glucose transport to the control of the glycolytic flux in *Trypanosoma brucei* *Proc Natl Acad Sci U S A* **96**, 10098-10103.
6. Nwagwu M, Opperdoes FR (1982) Regulation of glycolysis in *Trypanosoma brucei*: hexokinase and phosphofructokinase activity *Acta Trop* **39**, 61-72.
7. Bakker BM, Michels PA, Opperdoes FR, Westerhoff HV (1999) What controls glycolysis in bloodstream form *Trypanosoma brucei*? *J Biol Chem* **274**, 14551-14559.
8. Helfert S, Estevez AM, Bakker B, Michels P, Clayton C (2001) Roles of triosephosphate isomerase and aerobic metabolism in *Trypanosoma brucei* *Biochem J* **357**, 117-125.
9. Cronin CN, Tipton KF (1985) Purification and regulatory properties of phosphofructokinase from *Trypanosoma (Trypanozoon) brucei brucei* *Biochem J* **227**, 113-124.
10. Cronin CN, Tipton KF (1987) Kinetic studies on the reaction catalysed by phosphofructokinase from *Trypanosoma brucei* *Biochem J* **245**, 13-18.
11. Callens M, Kuntz DA, Opperdoes FR (1991) Characterization of pyruvate kinase of *Trypanosoma brucei* and its role in the regulation of carbohydrate metabolism *Mol Biochem Parasitol* **47**, 19-29.
12. Lambeir AM, Opperdoes FR, Wierenga RK (1987) Kinetic properties of triose-phosphate isomerase from *Trypanosoma brucei brucei*. A comparison with the rabbit muscle and yeast enzymes *Eur J Biochem* **168**, 69-74.
13. Lambeir AM, Loiseau AM, Kuntz DA, Vellieux FM, Michels PA, Opperdoes FR (1991) The cytosolic and glycosomal glyceraldehyde-3-phosphate dehydrogenase from *Trypanosoma brucei*. Kinetic properties and comparison with homologous enzymes *Eur J Biochem* **198**, 429-435.
14. Marche S, Michels PA, Opperdoes FR (2000) Comparative study of *Leishmania mexicana* and *Trypanosoma brucei* NAD-dependent glycerol-3-phosphate dehydrogenase *Mol Biochem Parasitol* **106**, 83-91.
15. Fairlamb AH, Bowman IB (1977) *Trypanosoma brucei*: suramin and other trypanocidal compounds' effects on sn-glycerol-3-phosphate oxidase *Exp Parasitol* **43**, 353-361.

16. Kralova I, Rigden DJ, Opperdoes FR, Michels PA (2000) Glycerol kinase of *Trypanosoma brucei*. Cloning, molecular characterization and mutagenesis *Eur J Biochem* **267**, 2323-2333.
17. Teusink B, Passarge J, Reijenga C, Esgalhado E, van der Weijden C, Schepper M, Walsh M, Bakker B, van Dam K, Westerhoff H, *et al.* (2000) Can yeast glycolysis be understood in terms of in vitro kinetics of the constituent enzymes? Testing biochemistry *Eur J Biochem* **267**, 5313-5329.
18. Misset O, Opperdoes FR (1987) The phosphoglycerate kinases from *Trypanosoma brucei* *Eur. J. Biochem.* **162**, 493-500.
19. Guerra DG, Vertommen D, Fothergill-Gilmore LA, Opperdoes FR, Michels PA (2004) Characterization of the cofactor-independent phosphoglycerate mutase from *Leishmania mexicana mexicana*. Histidines that coordinate the two metal ions in the active site show different susceptibilities to irreversible chemical modification *Eur J Biochem* **271**, 1798-1810.
20. Chevalier N, Rigden DJ, Van Roy J, Opperdoes FR, Michels PA (2000) *Trypanosoma brucei* contains a 2,3-bisphosphoglycerate independent phosphoglycerate mutase *Eur J Biochem* **267**, 1464-1472.
21. Hannaert V, Albert MA, Rigden DJ, da Silva Giotto MT, Thiemann O, Garratt RC, Van Roy J, Opperdoes FR, Michels PA (2003) Kinetic characterization, structure modelling studies and crystallization of *Trypanosoma brucei* enolase *Eur J Biochem* **270**, 3205-3213.
22. Barnard JP, Pedersen PL (1988) Purification in a single step and kinetic characterization of the pyruvate kinase of *Trypanosoma brucei* *Mol Biochem Parasitol* **31**, 141-147.
23. Callens M, Opperdoes FR (1992) Some kinetic properties of pyruvate kinase from *Trypanosoma brucei* *Mol Biochem Parasitol* **50**, 235-243.
24. Wiemer EA, Ter Kuile BH, Michels PA, Opperdoes FR (1992) Pyruvate transport across the plasma membrane of the bloodstream form of *Trypanosoma brucei* is mediated by a facilitated diffusion carrier *Biochem Biophys Res Commun* **184**, 1028-1034.
25. Bergmeyer HU (1974) *Methods of enzymatic analysis* (Academic Press, New York).
26. Opperdoes FR, Baudhuin P, Coppens I, De Roe C, Edwards SW, Weijers PJ, Misset O (1984) Purification, morphometric analysis, and characterization of the glycosomes (microbodies) of the protozoan hemoflagellate *Trypanosoma brucei* *J Cell Biol* **98**, 1178-1184.
